# Supplementary material
Source: PubMed Central journal article supplement (PMC3993203)
Supplement: AAC.02262-13_zac005142834so1.pdf [file AAC.02262-13_zac005142834so1.pdf]

## Supplemental Figures

**Figure S1: Mean  $\theta_{YC}$  distances from baseline community during saline treatment and recovery.**

Based on family-level (A) and 3% OTU-level (B) sequence assignments. An asterisk (\*,  $p < 0.05$ ) indicates a significant difference from the mean distance between all day 0 communities (Day 0 to Day 0) by the non-parametric data Kruskal-Wallis test followed by Dunn's Multiple Comparison Test. Error bars represent  $\pm$  SD.

**Table S1: AMOVA  $p$ -values of distances between consecutive time points during tigecycline treatment.**

**Table S2: Relative abundances of bacterial families in the fecal microbiota before, during and after tigecycline treatment. Mean percent abundances  $\pm$  SD.**

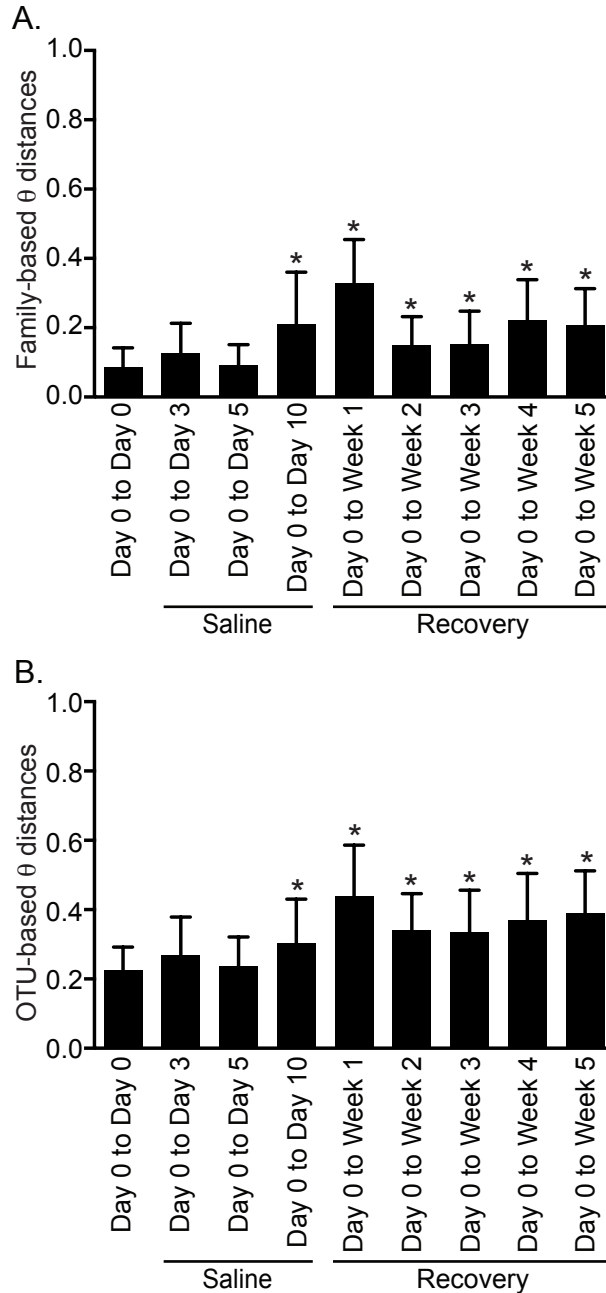

**Figure S1: Mean  $\theta_{\gamma c}$  distances from baseline community during saline treatment and recovery.**

Based on family-level (A) and 3% OTU-level (B) sequence assignments. An asterisk (\*,  $p < 0.05$ ) indicates a significant difference from the mean distance between all day 0 communities (Day 0 to Day 0) by the non-parametric data Kruskal-Wallis test followed by Dunn's Multiple Comparison Test. Error bars represent  $\pm$  SD.

| <b>Supplemental Table 1</b>                                                                             |                             |
|---------------------------------------------------------------------------------------------------------|-----------------------------|
| <b>Comparisons of Consecutive Communities of Tigecycline Treated Mice During Treatment and Recovery</b> | <b>AMOVA <i>p</i>-value</b> |
| Day 0 (Baseline) to Day 3 (Tigecycline)                                                                 | <0.001                      |
| Day 3 (Tigecycline) to Day 5 (Tigecycline)                                                              | 0.017                       |
| Day 5 (Tigecycline) to Day 10 (Tigecycline)                                                             | <0.001                      |
| Day 10 (Tigecycline) to Week 1 (Recovery)                                                               | <0.001                      |
| Week 1 (Recovery) to Week 2 (Recovery)                                                                  | 0.034                       |
| Week 2 (Recovery) to Week 3 (Recovery)                                                                  | 0.025                       |
| Week 3 (Recovery) to Week 4 (Recovery)                                                                  | 0.435                       |
| Week 4 (Recovery) to Week 5 (Recovery)                                                                  | 0.717                       |

| Supplemental Table 2       |                       |                |                |               |                |               |               |               |               |
|----------------------------|-----------------------|----------------|----------------|---------------|----------------|---------------|---------------|---------------|---------------|
|                            | Tigecycline Treatment |                |                |               | Recovery       |               |               |               |               |
|                            | Day 0                 | Day 3          | Day 5          | Day 10        | Week 1         | Week 2        | Week 3        | Week 4        | Week 5        |
| <b>Bacteroidetes</b>       |                       |                |                |               |                |               |               |               |               |
| Porphyromonadaceae         | 55.44 ± 8.31%         | 19.81 ± 11.27% | 26.65 ± 7.48%  | 31.33 ± 6.38% | 44.67 ± 12.36% | 58.53 ± 5.52% | 63.21 ± 4.55% | 60.94 ± 5.90% | 58.27 ± 3.82% |
| Rikenellaceae              | 5.99 ± 3.52%          | 0.01 ± 0.02%   | 0.07 ± 0.13%   | 0.01 ± 0.02%  | 0.02 ± 0.02%   | 0.01 ± 0.02%  | 0.01 ± 0.01%  | 0.01 ± 0.01%  | 0.02 ± 0.03%  |
| Bacteroidaceae             | 9.43 ± 5.03%          | 0.03 ± 0.04%   | 0.06 ± 0.14%   | 0.02 ± 0.04%  | 0.00 ± 0.00%   | 0.02 ± 0.02%  | 0.01 ± 0.01%  | 0.02 ± 0.01%  | 0.01 ± 0.02%  |
| Unclassified Bacteroidales | 9.36 ± 2.63%          | 0.03 ± 0.05%   | 1.74 ± 3.04%   | 17.63 ± 6.89% | 24.51 ± 2.91%  | 20.17 ± 1.70% | 10.51 ± 2.54% | 11.67 ± 5.53% | 11.72 ± 2.78% |
| Unclassified Bacteroidetes | 1.96 ± 0.79%          | 0.02 ± 0.02%   | 0.08 ± 0.09%   | 10.44 ± 7.13% | 0.23 ± 0.10%   | 0.22 ± 0.08%  | 0.09 ± 0.05%  | 0.18 ± 0.08%  | 0.15 ± 0.08%  |
| <b>Proteobacteria</b>      |                       |                |                |               |                |               |               |               |               |
| Enterobacteriaceae         | 0.75 ± 1.58%          | 57.88 ± 7.31%  | 53.07 ± 8.96%  | 30.34 ± 6.93% | 12.27 ± 5.05%  | 4.15 ± 3.87%  | 0.18 ± 0.30%  | 2.54 ± 5.03%  | 0.02 ± 0.02%  |
| <b>Verrucomicrobiae</b>    |                       |                |                |               |                |               |               |               |               |
| Verrucomicrobiaceae        | 0.73 ± 2.16%          | 15.87 ± 8.44%  | 14.61 ± 10.40% | 7.06 ± 2.84%  | 7.46 ± 5.82%   | 0.41 ± 0.24%  | 0.27 ± 0.18%  | 0.45 ± 0.87%  | 0.03 ± 0.03%  |
| <b>Firmicutes</b>          |                       |                |                |               |                |               |               |               |               |
| Lactobacillaceae           | 2.96 ± 1.31%          | 6.25 ± 6.07%   | 3.02 ± 1.20%   | 0.95 ± 0.56%  | 2.05 ± 1.46%   | 4.28 ± 1.58%  | 4.32 ± 0.65%  | 2.06 ± 0.64%  | 2.36 ± 1.01%  |
| Lachnospiraceae            | 8.58 ± 6.52%          | 0.03 ± 0.05%   | 0.33 ± 0.73    | 0.27 ± 0.81%  | 1.09 ± 0.97%   | 4.41 ± 1.87%  | 10.18 ± 4.20% | 11.56 ± 5.48% | 8.98 ± 4.26%  |
| Ruminococcaceae            | 1.10 ± 1.16%          | 0.01 ± 0.02%   | 0.07 ± 0.15%   | 0.15 ± 0.48%  | 0.40 ± 0.09%   | 1.32 ± 0.45%  | 1.70 ± 0.84%  | 2.56 ± 1.21%  | 2.20 ± 0.99%  |
| Unclassified Clostridiales | 1.80 ± 1.54%          | 0.02 ± 0.05%   | 0.06 ± 0.11%   | 0.06 ± 0.18%  | 1.89 ± 1.15%   | 1.13 ± 0.56%  | 2.53 ± 1.07%  | 2.51 ± 1.22%  | 1.92 ± 0.95%  |
| Erysipelotrichaceae        | 0.86 ± 1.75%          | 0.01 ± 0.03%   | 0.01 ± 0.02%   | 1.48 ± 1.79%  | 5.16 ± 2.93%   | 5.09 ± 2.07%  | 6.49 ± 1.71%  | 4.36 ± 1.07%  | 12.68 ± 4.36% |
| Unclassified Firmicutes    | 0.36 ± 0.23%          | 0.00 ± 0.00%   | 0.00 ± 0.01%   | 0.08 ± 0.25%  | 0.01 ± 0.01%   | 0.09 ± 0.14%  | 0.28 ± 0.17%  | 0.94 ± 0.30%  | 1.34 ± 1.02%  |
